# Supplementary material for: A Review of Enhancement of Biohydrogen Productions by Chemical Addition Using a Supervised Machine Learning Method
Source: MDPI journal article supplement (doi:10.3390/en14185916), 2021-09-17
Supplement: s1 [file s1]

# A Review of Enhancement of Biohydrogen Productions by Chemical Addition Using a Supervised Machine Learning Method

Yiyang Liu <sup>1,†</sup>, Jinze Liu <sup>1,†</sup>, Hongzhen He <sup>1</sup>, Shanru Yang <sup>2</sup>, Yixiao Wang <sup>1</sup>, Jin Hu <sup>1</sup>, Huan Jin <sup>3,\*</sup>, Tianxiang Cui <sup>3</sup>, Gang Yang <sup>4</sup> and Yong Sun <sup>1,5,\*</sup>

- <sup>1</sup> Key Laboratory of Carbonaceous Wastes Processing and Process Intensification of Zhejiang Province, University of Nottingham Ningbo, Ningbo 315100, China; yiyangliu0904@163.com (Y.L.); jinze\_Lau@163.com (J.L.); Hongzhen.he20@imperial.ac.uk (H.H.); shyyw12@nottingham.edu.cn (Y.W.); ssyjh3@nottingham.edu.cn (J.H.)
- <sup>2</sup> Centre for English Language Education (CELE), University of Nottingham Ningbo, Ningbo 315100, China; shanru.yang@nottingham.edu.cn
- <sup>3</sup> School of Computer Science, University of Nottingham Ningbo, Ningbo 315100, China; tianxiang.cui@nottingham.edu.cn
- <sup>4</sup> Institute of Process Engineering, Chinese Academy of Sciences, Beijing 10086, China; yanggang@ipe.ac.cn
- <sup>5</sup> School of Engineering, Edith Cowan University, 70 Joondalup Drive, Perth, WA 6027 Australia
- \* Correspondence: huan.jin@nottingham.edu.cn (H.J.); y.sun@ecu.edu.au or yong.sun@nottingham.edu.cn (Y.S.)
- † Authors have equal contributions.

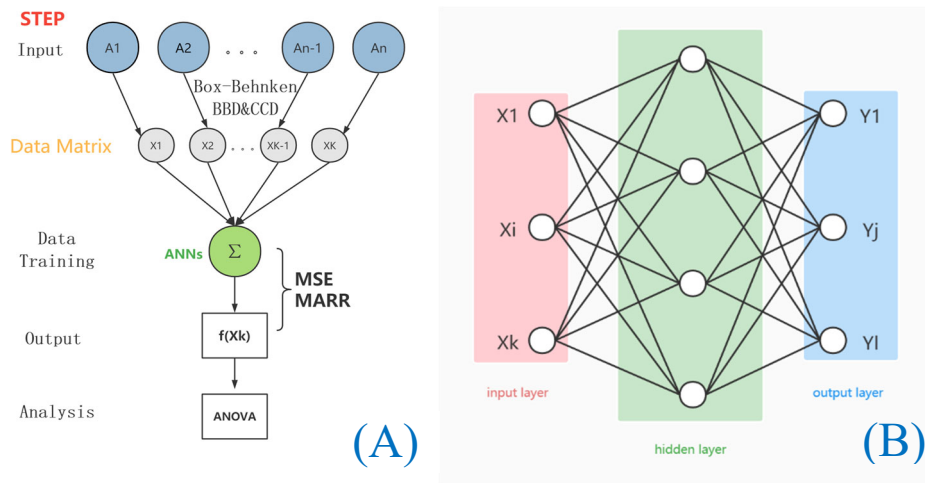

Figure S1. Schematic diagram of methodology: (A) The procedures flowchart, (B) ANNs construction: feed forward three layers networks.

Table S1. Ions comparisons upon BioH<sub>2</sub> generation, - refers to all data missing as, for convenience of calculation, the missing value was replaced by the averaged value during artificial neuron network learning process.

| Mg <sup>2+</sup> /mmol/L | Cu <sup>2+</sup> /mmol/L | Na <sup>+</sup> /mmol/L | NH <sub>4</sub> <sup>+</sup> /mmol/L | K <sup>+</sup> /mmol/L | HY/mmol/g | HER/mmol/L.h <sup>-1</sup> | Reference |
|--------------------------|--------------------------|-------------------------|--------------------------------------|------------------------|-----------|----------------------------|-----------|
| 1.05                     | 0.002                    | 10.21                   | 17.57                                | 1.38                   | 2.9       | 5.4                        | [45]      |
| 0.99                     | -                        | 47                      | -                                    | 1.1                    | 3         | 13.07                      | [46]      |
| 1.23                     | -                        | -                       | 9.09                                 | -                      | 20        | 0.4                        | [47]      |
| 67.9                     | -                        | 49.9                    | 420.8                                | 122.5                  | 13.3      | 2                          | [48]      |
| 5.2                      | -                        | 32.5                    | -                                    | 25.1                   | 0.9       | 2.4                        | [49]      |
| 1.754                    | -                        | 9.58                    | 1.77                                 | 2.29                   | 15.9      | 10.1                       | [50]      |
| 0.35                     | -                        | 0.939                   | 0.39                                 | 0.46                   | 12.9      | 5.69                       | [51]      |
| 1.05                     | 0.002                    | 10.21                   | 17.57                                | 1.38                   | 5         | 13.07                      | [46]      |
| 1.23                     | -                        | 26.37                   | 9.17                                 | -                      | 24.2      | 0.8                        | [47]      |
| 1.02                     | -                        | 14.6                    | 3.17                                 | -                      | 1.92      | 2.5                        | [52]      |
| 0.62                     | -                        | 37.27                   | -                                    | -                      | 16.75     | 102.5                      | [25]      |
| 2.15                     | -                        | -                       | 2                                    | -                      | 7.85      | 62.4                       | [24]      |
| 0.4                      | -                        | 12.7                    | 2.5                                  | 0.7                    | 1.9       | 49.4                       | [53]      |
| 0.11                     | 0.06                     | 0.1                     | 6.6                                  | 0.4                    | 8.4       | 0.6                        | [42]      |
| 3.596                    | -                        | 26.37                   | 45.05                                | -                      | 3.875     | 1.92                       | [54]      |
| 3.596                    | -                        | -                       | 45.05                                | -                      | 9.2       | 3.1                        | [54]      |
| 1.04                     | -                        | 14.6                    | 3.17                                 | -                      | 1.92      | 2.5                        | [52]      |
| 3.596                    | -                        | 26.37                   | 10                                   | 2                      | 10.1      | 0.23                       | [55]      |
| 2.25                     | -                        | 100.02                  | 49.94                                | 49.97                  | 11.66     | 3.2                        | [30]      |
| 0.348                    | 0.097                    | 5.23                    | 3.74                                 | 0.735                  | 1.58      | 0.066                      | [56]      |
| 0.035                    | -                        | 0.01                    | 42.2                                 | 0.38                   | 6.7       | 0.23                       | [57]      |
| 0.985                    | -                        | 75.47                   | 9.49                                 | 2.87                   | 10.4      | 6                          | [58]      |
| 1.5                      | 0.01                     | -                       | 9.7                                  | 3                      | 14.1      | 11.5                       | [59]      |
| 1.02                     | 0.003                    | 43                      | -                                    | 1.5                    | 2.4       | 10.3                       | [46]      |
| 0.2                      | 0.02                     | 3.9                     | 7.8                                  | 0.8                    | 1.11      | 1.5                        | [20]      |
| 1.1                      | 0.06                     | 42.7                    | 9.7                                  | 36.1                   | 9.5       | 30                         | [27]      |
| 1.04                     | -                        | -                       | 10                                   | 2                      | 11.7      | 0.28                       | [55]      |
| 1.4                      | 0.05                     | -                       | 9.9                                  | 3.2                    | 12.7      | 10.4                       | [59]      |
| 0.99                     | -                        | 47                      | -                                    | 1.1                    | 10.8      | 1.3                        | [60]      |
| 0.99                     | -                        | 47                      | -                                    | 1.1                    | 2.7       | 11.5                       | [46]      |
| 0.11                     | 0.07                     | 0.09                    | 521                                  | 9.2                    | 1.21      | 0.22                       | [27]      |
| 0.11                     | 0.06                     | 0.1                     | 6.6                                  | 0.4                    | 7.25      | 0.5                        | [42]      |
| 14.8                     | -                        | -                       | 10.4                                 | -                      | 15.7      | 44.9                       | [25]      |

Table S2. ANOVA analysis for the effect of ions concentration upon HY, where  $r^2$  0.94, Adjust  $r^2$  0.93, Predicted  $r^2$  0.93, adequate precision (AP) 15.

| Source             | Sum of squares | DF | Mean square | F-value | <i>p</i> -value |
|--------------------|----------------|----|-------------|---------|-----------------|
| Model              | 2309.24        | 20 | 115.46      | 1.32    | 0.2554          |
| A-Mg <sup>2+</sup> | 19.50          | 1  | 19.50       | 0.2223  | 0.6414          |
| B-Cu <sup>2+</sup> | 31.18          | 1  | 31.18       | 0.3553  | 0.5565          |
| C-Na <sup>+</sup>  | 51.66          | 1  | 51.66       | 0.5887  | 0.4501          |
| D-NH <sup>4+</sup> | 32.96          | 1  | 32.96       | 0.3756  | 0.5455          |
| E-K <sup>+</sup>   | 33.49          | 1  | 33.49       | 0.3816  | 0.5423          |
| AB                 | 178.00         | 1  | 178.00      | 2.03    | 0.1667          |
| AC                 | 0.0263         | 1  | 0.0263      | 0.0003  | 0.9863          |
| AD                 | 456.62         | 1  | 456.62      | 5.20    | 0.0313          |
| AE                 | 2.38           | 1  | 2.38        | 0.0271  | 0.8706          |
| BC                 | 48.12          | 1  | 48.12       | 0.5483  | 0.4659          |
| BD                 | 69.86          | 1  | 69.86       | 0.7960  | 0.3808          |
| BE                 | 144.30         | 1  | 144.30      | 1.64    | 0.2115          |
| CD                 | 2.01           | 1  | 2.01        | 0.0229  | 0.8810          |
| CE                 | 1.52           | 1  | 1.52        | 0.0173  | 0.8963          |
| DE                 | 54.59          | 1  | 54.59       | 0.6221  | 0.4377          |
| A <sup>2</sup>     | 484.11         | 1  | 484.11      | 5.52    | 0.0270          |
| B <sup>2</sup>     | 244.16         | 1  | 244.16      | 2.78    | 0.1078          |
| C <sup>2</sup>     | 565.76         | 1  | 565.76      | 6.45    | 0.0177          |
| D <sup>2</sup>     | 681.36         | 1  | 681.36      | 7.76    | 0.0100          |
| E <sup>2</sup>     | 375.15         | 1  | 375.15      | 4.28    | 0.0492          |
| Residue            | 2193.86        | 25 | 87.75       |         |                 |
| Lack of fit        | 2193.86        | 20 | 109.69      |         |                 |
| Pure Error         | 0.0000         | 5  | 0.0000      |         |                 |
| Cor total          | 4503.10        | 45 |             |         |                 |
